# Supplementary material
Source: publisher figshare collection journal article supplement (https://tandf.figshare.com/articles/dataset/_/7936931)
Supplement: Supplementary file [file 2]

| <b>Virus</b> | <b>Mutation position</b> | <b>Region</b> | <b>Frequency</b> | <b>Nucleotide</b> | <b>Transition / Transversion</b> | <b>Amino acid</b> | <b>Synonymous / Non-Synonymous</b> |
|--------------|--------------------------|---------------|------------------|-------------------|----------------------------------|-------------------|------------------------------------|
| *WT_IC #1    | 23                       | 5'NTR         | 0,037            | G>A               | Transition                       |                   |                                    |
| *WT_IC #1    | 20                       | 5'NTR         | 0,016            | G>A               | Transition                       |                   |                                    |
| *WT_IC #1    | 24                       | 5'NTR         | 0,035            | C>T               | Transition                       |                   |                                    |
| *WT_IC #1    | 22                       | 5'NTR         | 0,052            | A>G               | Transition                       |                   |                                    |
| *WT_IC #2    | 283                      | nsP1          | 0,013            | A>C               | Transversion                     | Ala               | Synonymous                         |
| *WT_IC #2    | 1561                     | nsP1          | 0,011            | A>G               | Transition                       | Lys               | Synonymous                         |
| *WT_IC #2    | 4420                     | nsP3          | 0,968            | C>A               | Transversion                     | Ser               | Synonymous                         |
| *WT_IC #3    | 11761                    | 3'NTR         | 0,015            | T>C               | Transition                       |                   |                                    |
| *WT_ISA #1   | 22                       | 5'NTR         | 0,013            | A>G               | Transition                       |                   |                                    |
| *WT_ISA #1   | 1312                     | nsP1          | 0,243            | A>G               | Transition                       | Glu               | Synonymous                         |
| *WT_ISA #1   | 496                      | nsP1          | 0,264            | A>G               | Transition                       | Ser               | Synonymous                         |
| *WT_ISA #1   | 1323                     | nsP1          | 0,090            | C>T               | Transition                       | Thr > Ile         | Non-Synonymous                     |
| *WT_ISA #1   | 1400                     | nsP1          | 0,013            | A>G               | Transition                       | Lys > Glu         | Non-Synonymous                     |
| *WT_ISA #1   | 1909                     | nsP2          | 0,157            | A>G               | Transition                       | Ala               | Synonymous                         |
| *WT_ISA #1   | 2131                     | nsP2          | 0,250            | G>A               | Transition                       | Leu               | Synonymous                         |
| *WT_ISA #1   | 2345                     | nsP2          | 0,306            | A>G               | Transition                       | Met > Val         | Non-Synonymous                     |
| *WT_ISA #1   | 3016                     | nsP2          | 0,066            | A>G               | Transition                       | Ala               | Synonymous                         |
| *WT_ISA #1   | 3131                     | nsP2          | 0,012            | G>A               | Transition                       | Val > Ile         | Non-Synonymous                     |
| *WT_ISA #1   | 3291                     | nsP2          | 0,249            | A>G               | Transition                       | Lys > Arg         | Non-Synonymous                     |
| *WT_ISA #1   | 3643                     | nsP2          | 0,023            | A>G               | Transition                       | Val               | Synonymous                         |
| *WT_ISA #1   | 3664                     | nsP2          | 0,066            | A>G               | Transition                       | Gly               | Synonymous                         |
| *WT_ISA #1   | 3831                     | nsP2          | 0,091            | A>G               | Transition                       | Lys > Arg         | Non-Synonymous                     |
| *WT_ISA #1   | 4120                     | nsP3          | 0,024            | T>G               | Transversion                     | Asp > Glu         | Non-Synonymous                     |
| *WT_ISA #1   | 4192                     | nsP3          | 0,056            | A>C               | Transversion                     | Lys > Asn         | Non-Synonymous                     |
| *WT_ISA #1   | 4903                     | nsP3          | 0,269            | T>C               | Transition                       | Leu               | Synonymous                         |
| *WT_ISA #1   | 5083                     | nsP3          | 0,167            | A>G               | Transition                       | Thr               | Synonymous                         |
| *WT_ISA #1   | 5147                     | nsP3          | 0,054            | T>C               | Transition                       | Ser > Pro         | Non-Synonymous                     |
| *WT_ISA #1   | 5170                     | nsP3          | 0,054            | A>G               | Transition                       | Pro               | Synonymous                         |
| *WT_ISA #1   | 5249                     | nsP3          | 0,165            | T>C               | Transition                       | Trp > Arg         | Non-Synonymous                     |
| *WT_ISA #1   | 5396                     | nsP3          | 0,057            | A>G               | Transition                       | Thr > Ala         | Non-Synonymous                     |
| *WT_ISA #1   | 5630                     | nsP3          | 0,242            | A>G               | Transition                       | Thr > Ala         | Non-Synonymous                     |
| *WT_ISA #1   | 5917                     | nsP4          | 0,030            | T>C               | Transition                       | Cys               | Synonymous                         |
| *WT_ISA #1   | 5944                     | nsP4          | 0,058            | A>G               | Transition                       | Pro               | Synonymous                         |
| *WT_ISA #1   | 5982                     | nsP4          | 0,015            | T>C               | Transition                       | Val > Ala         | Non-Synonymous                     |
| *WT_ISA #1   | 6252                     | nsP4          | 0,049            | A>G               | Transition                       | Gln > Arg         | Non-Synonymous                     |
| *WT_ISA #1   | 6457                     | nsP4          | 0,011            | A>G               | Transition                       | Lys               | Synonymous                         |
| *WT_ISA #1   | 6827                     | nsP4          | 0,055            | T>C               | Transition                       | Leu               | Synonymous                         |
| *WT_ISA #1   | 7720                     | capsid        | 0,062            | A>G               | Transition                       | Thr > Ala         | Non-Synonymous                     |
| *WT_ISA #1   | 7849                     | capsid        | 0,020            | A>G               | Transition                       | Lys > Glu         | Non-Synonymous                     |
| *WT_ISA #1   | 7896                     | capsid        | 0,060            | A>G               | Transition                       | Glu               | Synonymous                         |
| *WT_ISA #1   | 8476                     | E3            | 0,290            | A>G               | Transition                       | Met > Val         | Non-Synonymous                     |
| *WT_ISA #1   | 8520                     | E3            | 0,014            | T>C               | Transition                       | Cys               | Synonymous                         |
| *WT_ISA #1   | 8779                     | E2            | 0,027            | A>G               | Transition                       | Arg > Gly         | Non-Synonymous                     |
| *WT_ISA #1   | 8862                     | E2            | 0,069            | A>G               | Transition                       | Lys               | Synonymous                         |
| *WT_ISA #1   | 8891                     | E2            | 0,270            | A>G               | Transition                       | Asp > Gly         | Non-Synonymous                     |
| *WT_ISA #1   | 9180                     | E2            | 0,013            | A>G               | Transition                       | Thr               | Synonymous                         |
| *WT_ISA #1   | 9235                     | E2            | 0,012            | C>T               | Transition                       | His > Tyr         | Non-Synonymous                     |
| *WT_ISA #1   | 9459                     | E2            | 0,010            | T>C               | Transition                       | Tyr               | Synonymous                         |
| *WT_ISA #1   | 9714                     | E2            | 0,010            | T>C               | Transition                       | Cys               | Synonymous                         |

|            |       |         |       |     |              |           |                |
|------------|-------|---------|-------|-----|--------------|-----------|----------------|
| *WT_ISA #1 | 9799  | E2      | 0,063 | A>G | Transition   | Thr > Ala | Non-Synonymous |
| *WT_ISA #1 | 10154 | E1      | 0,024 | T>C | Transition   | Val > Ala | Non-Synonymous |
| *WT_ISA #1 | 10383 | E1      | 0,263 | A>G | Transition   | Ser       | Synonymous     |
| *WT_ISA #1 | 10506 | E1      | 0,033 | A>G | Transition   | Thr       | Synonymous     |
| *WT_ISA #1 | 11033 | E1      | 0,260 | A>G | Transition   | Glu > Gly | Non-Synonymous |
| *WT_ISA #1 | 11073 | E1      | 0,094 | A>G | Transition   | Leu       | Synonymous     |
| *WT_ISA #1 | 11151 | E1      | 0,014 | C>T | Transition   | His       | Synonymous     |
| *WT_ISA #1 | 11273 | E1      | 0,012 | T>C | Transition   | Ile > Thr | Non-Synonymous |
| *WT_ISA #1 | 11473 | 3'NTR   | 0,029 | T>C | Transition   |           |                |
| *WT_ISA #2 | 399   | nsP1    | 0,231 | T>C | Transition   | Leu > Pro | Non-Synonymous |
| *WT_ISA #2 | 811   | nsP1    | 0,026 | A>G | Transition   | Ser       | Synonymous     |
| *WT_ISA #2 | 69    | 5'NTR   | 0,127 | A>G | Transition   |           |                |
| *WT_ISA #2 | 1237  | nsP1    | 0,037 | C>T | Transition   | Val       | Synonymous     |
| *WT_ISA #2 | 1347  | nsP1    | 0,152 | A>T | Transversion | Lys > Met | Non-Synonymous |
| *WT_ISA #2 | 1551  | nsP1    | 0,021 | A>G | Transition   | Asp > Gly | Non-Synonymous |
| *WT_ISA #2 | 1988  | nsP2    | 0,162 | C>T | Transition   | Leu       | Synonymous     |
| *WT_ISA #2 | 2332  | nsP2    | 0,129 | C>T | Transition   | Ile       | Synonymous     |
| *WT_ISA #2 | 2526  | nsP2    | 0,162 | A>G | Transition   | Lys > Arg | Non-Synonymous |
| *WT_ISA #2 | 2995  | nsP2    | 0,226 | A>G | Transition   | Pro       | Synonymous     |
| *WT_ISA #2 | 3160  | nsP2    | 0,096 | A>G | Transition   | Lys       | Synonymous     |
| *WT_ISA #2 | 3205  | nsP2    | 0,130 | A>G | Transition   | Glu       | Synonymous     |
| *WT_ISA #2 | 3321  | nsP2    | 0,010 | A>G | Transition   | Asn > Ser | Non-Synonymous |
| *WT_ISA #2 | 3376  | nsP2    | 0,039 | A>G | Transition   | Ala       | Synonymous     |
| *WT_ISA #2 | 3556  | nsP2    | 0,055 | A>G | Transition   | Glu       | Synonymous     |
| *WT_ISA #2 | 3678  | nsP2    | 0,018 | A>G | Transition   | Tyr > Cys | Non-Synonymous |
| *WT_ISA #2 | 3928  | nsP2    | 0,033 | A>G | Transition   | Arg       | Synonymous     |
| *WT_ISA #2 | 3936  | nsP2    | 0,029 | A>G | Transition   | Lys > Arg | Non-Synonymous |
| *WT_ISA #2 | 3943  | nsP2    | 0,054 | A>T | Transversion | Pro       | Synonymous     |
| *WT_ISA #2 | 4290  | nsP3    | 0,079 | A>G | Transition   | Lys       | Synonymous     |
| *WT_ISA #2 | 4411  | nsP3    | 0,013 | T>C | Transition   | Gly       | Synonymous     |
| *WT_ISA #2 | 4891  | nsP3    | 0,082 | C>T | Transition   | Arg       | Synonymous     |
| *WT_ISA #2 | 5038  | nsP3    | 0,090 | A>G | Transition   | Pro       | Synonymous     |
| *WT_ISA #2 | 5396  | nsP3    | 0,123 | A>G | Transition   | Thr > Ala | Non-Synonymous |
| *WT_ISA #2 | 5604  | nsP3    | 0,224 | A>G | Transition   | Asp > Gly | Non-Synonymous |
| *WT_ISA #2 | 5739  | nsP4    | 0,063 | A>G | Transition   | Val       | Synonymous     |
| *WT_ISA #2 | 5818  | nsP4    | 0,124 | A>G | Transition   | Lys       | Synonymous     |
| *WT_ISA #2 | 6196  | nsP4    | 0,076 | T>C | Transition   | Ala       | Synonymous     |
| *WT_ISA #2 | 6761  | nsP4    | 0,060 | A>G | Transition   | Thr > Ala | Non-Synonymous |
| *WT_ISA #2 | 6857  | nsP4    | 0,018 | C>T | Transition   | His > Tyr | Non-Synonymous |
| *WT_ISA #2 | 7222  | nsP4    | 0,235 | T>C | Transition   | Ala       | Synonymous     |
| *WT_ISA #2 | 7503  | liaison | 0,121 | T>C | Transition   |           |                |
| *WT_ISA #2 | 7905  | capsid  | 0,035 | T>C | Transition   | Cys       | Synonymous     |
| *WT_ISA #2 | 7974  | capsid  | 0,040 | A>G | Transition   | Lys       | Synonymous     |
| *WT_ISA #2 | 8321  | capsid  | 0,079 | A>G | Transition   | Lys > Arg | Non-Synonymous |
| *WT_ISA #2 | 8625  | E2      | 0,059 | C>T | Transition   | Cys       | Synonymous     |
| *WT_ISA #2 | 9164  | E2      | 0,283 | A>G | Transition   | Glu > Gly | Non-Synonymous |
| *WT_ISA #2 | 9311  | E2      | 0,051 | T>C | Transition   | Ile > Thr | Non-Synonymous |
| *WT_ISA #2 | 9334  | E2      | 0,033 | A>G | Transition   | Thr > Ala | Non-Synonymous |
| *WT_ISA #2 | 9447  | E2      | 0,027 | A>G | Transition   | Glu       | Synonymous     |
| *WT_ISA #2 | 10311 | E1      | 0,279 | A>C | Transversion | Ala       | Synonymous     |
| *WT_ISA #2 | 11041 | E1      | 0,040 | T>C | Transition   | Ser > Pro | Non-Synonymous |
| *WT_ISA #2 | 11106 | E1      | 0,089 | T>C | Transition   | Ser       | Synonymous     |

|            |       |        |       |     |              |           |                |
|------------|-------|--------|-------|-----|--------------|-----------|----------------|
| *WT_ISA #2 | 11172 | E1     | 0,033 | A>G | Transition   | Ser       | Synonymous     |
| *WT_ISA #2 | 11179 | E1     | 0,033 | A>G | Transition   | Thr > Ala | Non-Synonymous |
| *WT_ISA #2 | 11316 | 3'NTR  | 0,289 | T>C | Transition   |           |                |
| *WT_ISA #2 | 11320 | 3'NTR  | 0,063 | A>G | Transition   |           |                |
| *WT_ISA #2 | 11601 | 3'NTR  | 0,122 | A>G | Transition   |           |                |
| *WT_ISA #2 | 11703 | 3'NTR  | 0,111 | C>A | Transversion |           |                |
| *WT_ISA #2 | 11717 | 3'NTR  | 0,012 | A>G | Transition   |           |                |
| *WT_ISA #3 | 25    | 5'NTR  | 0,023 | C>T | Transition   |           |                |
| *WT_ISA #3 | 23    | 5'NTR  | 0,151 | G>T | Transversion |           |                |
| *WT_ISA #3 | 646   | nsP1   | 0,024 | T>C | Transition   | Gly       | Synonymous     |
| *WT_ISA #3 | 747   | nsP1   | 0,062 | A>G | Transition   | Lys > Arg | Non-Synonymous |
| *WT_ISA #3 | 1096  | nsP1   | 0,095 | T>C | Transition   | Asp       | Synonymous     |
| *WT_ISA #3 | 1057  | nsP1   | 0,010 | A>G | Transition   | Ser       | Synonymous     |
| *WT_ISA #3 | 22    | 5'NTR  | 0,149 | A>G | Transition   |           |                |
| *WT_ISA #3 | 24    | 5'NTR  | 0,080 | C>T | Transition   |           |                |
| *WT_ISA #3 | 190   | nsP1   | 0,160 | T>C | Transition   | Ala       | Synonymous     |
| *WT_ISA #3 | 352   | nsP1   | 0,081 | A>G | Transition   | Arg       | Synonymous     |
| *WT_ISA #3 | 1526  | nsP1   | 0,025 | A>G | Transition   | Ser > Gly | Non-Synonymous |
| *WT_ISA #3 | 1621  | nsP1   | 0,093 | A>G | Transition   | Ala       | Synonymous     |
| *WT_ISA #3 | 1650  | nsP1   | 0,013 | A>G | Transition   | Asp > Gly | Non-Synonymous |
| *WT_ISA #3 | 1694  | nsP2   | 0,102 | A>G | Transition   | Thr > Ala | Non-Synonymous |
| *WT_ISA #3 | 1737  | nsP2   | 0,054 | A>G | Transition   | His > Arg | Non-Synonymous |
| *WT_ISA #3 | 1749  | nsP2   | 0,074 | A>G | Transition   | Glu > Gly | Non-Synonymous |
| *WT_ISA #3 | 2359  | nsP2   | 0,092 | T>C | Transition   | Gly       | Synonymous     |
| *WT_ISA #3 | 3397  | nsP2   | 0,044 | T>C | Transition   | Tyr       | Synonymous     |
| *WT_ISA #3 | 3596  | nsP2   | 0,185 | G>A | Transition   | Val > Ile | Non-Synonymous |
| *WT_ISA #3 | 3635  | nsP2   | 0,086 | A>G | Transition   | Thr > Ala | Non-Synonymous |
| *WT_ISA #3 | 3738  | nsP2   | 0,042 | T>C | Transition   | Ile > Thr | Non-Synonymous |
| *WT_ISA #3 | 3745  | nsP2   | 0,123 | A>G | Transition   | Thr       | Synonymous     |
| *WT_ISA #3 | 3775  | nsP2   | 0,140 | C>T | Transition   | Cys       | Synonymous     |
| *WT_ISA #3 | 3823  | nsP2   | 0,095 | A>G | Transition   | Arg       | Synonymous     |
| *WT_ISA #3 | 3871  | nsP2   | 0,123 | A>G | Transition   | Ala       | Synonymous     |
| *WT_ISA #3 | 3955  | nsP2   | 0,081 | C>T | Transition   | Ser       | Synonymous     |
| *WT_ISA #3 | 4507  | nsP3   | 0,102 | C>T | Transition   | Arg       | Synonymous     |
| *WT_ISA #3 | 4818  | nsP3   | 0,043 | T>C | Transition   | Val > Ala | Non-Synonymous |
| *WT_ISA #3 | 5067  | nsP3   | 0,084 | C>T | Transition   | Ala > Val | Non-Synonymous |
| *WT_ISA #3 | 5392  | nsP3   | 0,013 | A>G | Transition   | Gln       | Synonymous     |
| *WT_ISA #3 | 5527  | nsP3   | 0,124 | A>G | Transition   | Glu       | Synonymous     |
| *WT_ISA #3 | 5530  | nsP3   | 0,011 | A>G | Transition   | Gly       | Synonymous     |
| *WT_ISA #3 | 5576  | nsP3   | 0,012 | T>C | Transition   | Leu       | Synonymous     |
| *WT_ISA #3 | 5593  | nsP3   | 0,012 | T>C | Transition   | Asp       | Synonymous     |
| *WT_ISA #3 | 5791  | nsP4   | 0,035 | A>G | Transition   | Glu       | Synonymous     |
| *WT_ISA #3 | 6152  | nsP4   | 0,016 | A>G | Transition   | Thr > Ala | Non-Synonymous |
| *WT_ISA #3 | 6250  | nsP4   | 0,022 | A>G | Transition   | Leu       | Synonymous     |
| *WT_ISA #3 | 6481  | nsP4   | 0,057 | C>T | Transition   | Thr       | Synonymous     |
| *WT_ISA #3 | 6862  | nsP4   | 0,097 | C>T | Transition   | Ser       | Synonymous     |
| *WT_ISA #3 | 6940  | nsP4   | 0,093 | C>T | Transition   | Gly       | Synonymous     |
| *WT_ISA #3 | 6985  | nsP4   | 0,078 | A>G | Transition   | Thr       | Synonymous     |
| *WT_ISA #3 | 7647  | capsid | 0,135 | C>T | Transition   | Val       | Synonymous     |
| *WT_ISA #3 | 7745  | capsid | 0,012 | A>G | Transition   | Lys > Arg | Non-Synonymous |
| *WT_ISA #3 | 8232  | capsid | 0,137 | A>G | Transition   | Gly       | Synonymous     |
| *WT_ISA #3 | 8259  | capsid | 0,090 | A>G | Transition   | Gly       | Synonymous     |

|            |       |            |       |     |              |           |                |
|------------|-------|------------|-------|-----|--------------|-----------|----------------|
| *WT_ISA #3 | 8343  | capsid     | 0,037 | A>G | Transition   | Glu       | Synonymous     |
| *WT_ISA #3 | 8364  | E3         | 0,015 | A>G | Transition   | Pro       | Synonymous     |
| *WT_ISA #3 | 8564  | E2         | 0,087 | T>C | Transition   | Val > Ala | Non-Synonymous |
| *WT_ISA #3 | 8695  | E2         | 0,084 | T>C | Transition   | Leu       | Synonymous     |
| *WT_ISA #3 | 8711  | E2         | 0,013 | A>G | Transition   | Lys > Arg | Non-Synonymous |
| *WT_ISA #3 | 8779  | E2         | 0,095 | A>G | Transition   | Arg > Gly | Non-Synonymous |
| *WT_ISA #3 | 8807  | E2         | 0,012 | C>T | Transition   | Ala > Val | Non-Synonymous |
| *WT_ISA #3 | 8823  | E2         | 0,078 | T>C | Transition   | Thr       | Synonymous     |
| *WT_ISA #3 | 8935  | E2         | 0,130 | G>A | Transition   | Asp > Asn | Non-Synonymous |
| *WT_ISA #3 | 8988  | E2         | 0,143 | A>G | Transition   | Lys       | Synonymous     |
| *WT_ISA #3 | 8997  | E2         | 0,047 | T>C | Transition   | Pro       | Synonymous     |
| *WT_ISA #3 | 9232  | E2         | 0,035 | A>G | Transition   | Asn > Asp | Non-Synonymous |
| *WT_ISA #3 | 9449  | E2         | 0,012 | A>G | Transition   | Glu > Gly | Non-Synonymous |
| *WT_ISA #3 | 9450  | E2         | 0,013 | A>G | Transition   | Glu       | Synonymous     |
| *WT_ISA #3 | 9593  | E2         | 0,052 | A>G | Transition   | His > Arg | Non-Synonymous |
| *WT_ISA #3 | 9837  | 6k peptide | 0,046 | C>T | Transition   | Tyr       | Synonymous     |
| *WT_ISA #3 | 10356 | E1         | 0,012 | A>G | Transition   | Ala       | Synonymous     |
| *WT_ISA #3 | 10422 | E1         | 0,027 | T>C | Transition   | Thr       | Synonymous     |
| *WT_ISA #3 | 10852 | E1         | 0,048 | T>C | Transition   | Phe > Leu | Non-Synonymous |
| *WT_ISA #3 | 10917 | E1         | 0,016 | T>C | Transition   | His       | Synonymous     |
| *WT_ISA #3 | 11034 | E1         | 0,099 | A>G | Transition   | Glu       | Synonymous     |
| *WT_ISA #3 | 11080 | E1         | 0,045 | G>A | Transition   | Ala > Thr | Non-Synonymous |
| *WT_ISA #3 | 11339 | 3'NTR      | 0,077 | T>C | Transition   |           |                |
| *WT_ISA #3 | 11608 | 3'NTR      | 0,226 | T>C | Transition   |           |                |
| *WT_SPR #1 | 24    | 5'NTR      | 0,032 | C>T | Transition   |           |                |
| *WT_SPR #1 | 22    | 5'NTR      | 0,071 | A>G | Transition   |           |                |
| *WT_SPR #1 | 1774  | nsP2       | 0,013 | C>T | Transition   | Thr       | Synonymous     |
| *WT_SPR #1 | 4111  | nsP3       | 0,011 | G>C | Transversion | Ala       | Synonymous     |
| *WT_SPR #1 | 8898  | E2         | 0,044 | G>A | Transition   | Arg       | Synonymous     |
| *WT_SPR #1 | 11277 | E1         | 0,011 | A>G | Transition   | Leu       | Synonymous     |
| *WT_SPR #2 | 23    | 5'NTR      | 0,039 | G>A | Transition   |           |                |
| *WT_SPR #2 | 24    | 5'NTR      | 0,222 | C>T | Transition   |           |                |
| *WT_SPR #2 | 22    | 5'NTR      | 0,483 | A>G | Transition   |           |                |
| *WT_SPR #2 | 2274  | nsP2       | 0,010 | A>G | Transition   | Asn > Ser | Non-Synonymous |
| *WT_SPR #2 | 9935  | 6k peptide | 0,026 | G>A | Transition   | Cys > Tyr | Non-Synonymous |
| *WT_SPR #3 | 1618  | nsP1       | 0,038 | G>A | Transition   | Gln       | Synonymous     |
| *WT_SPR #3 | 3461  | nsP2       | 0,027 | G>A | Transition   | Asp > Asn | Non-Synonymous |
| *WT_SPR #3 | 5587  | nsP3       | 0,055 | A>G | Transition   | Glu       | Synonymous     |
| *WT_SPR #3 | 5626  | nsP3       | 0,054 | A>G | Transition   | Ser       | Synonymous     |
| *WT_SPR #3 | 5709  | nsP4       | 0,056 | A>G | Transition   | Lys > Arg | Non-Synonymous |
| *WT_SPR #3 | 7631  | capsid     | 0,013 | G>A | Transition   | Arg > His | Non-Synonymous |
| *WT_SPR #3 | 11289 | E1         | 0,027 | A>G | Transition   | Leu       | Synonymous     |
| *WT_SPR #3 | 11312 | E1         | 0,024 | A>G | Transition   | STOP      | Synonymous     |
| *WT_SPR #3 | 11320 | 3'NTR      | 0,053 | A>G | Transition   |           |                |
| *WT_SPR #3 | 11324 | 3'NTR      | 0,054 | A>G | Transition   |           |                |
| WT_IC #1   | 22    | 5'NTR      | 0,150 | A>G | Transition   |           |                |
| WT_IC #1   | 25    | 5'NTR      | 0,015 | C>T | Transition   |           |                |
| WT_IC #1   | 545   | nsP1       | 0,018 | C>T | Transition   | His > Tyr | Non-Synonymous |
| WT_IC #1   | 20    | 5'NTR      | 0,033 | G>A | Transition   |           |                |
| WT_IC #1   | 23    | 5'NTR      | 0,012 | G>A | Transition   |           |                |
| WT_IC #1   | 24    | 5'NTR      | 0,124 | C>T | Transition   |           |                |
| WT_IC #2   | 24    | 5'NTR      | 0,279 | C>T | Transition   |           |                |

|           |       |         |       |     |              |           |                |
|-----------|-------|---------|-------|-----|--------------|-----------|----------------|
| WT_IC #2  | 90    | nsP1    | 0,013 | A>G | Transition   | Tyr > Cys | Non-Synonymous |
| WT_IC #2  | 883   | nsP1    | 0,010 | A>G | Transition   | Lys       | Synonymous     |
| WT_IC #2  | 19    | 5'NTR   | 0,088 | C>T | Transition   |           |                |
| WT_IC #2  | 20    | 5'NTR   | 0,093 | G>A | Transition   |           |                |
| WT_IC #2  | 22    | 5'NTR   | 0,336 | A>G | Transition   |           |                |
| WT_IC #2  | 23    | 5'NTR   | 0,016 | G>A | Transition   |           |                |
| WT_IC #2  | 25    | 5'NTR   | 0,073 | C>T | Transition   |           |                |
| WT_IC #2  | 1279  | nsP1    | 0,058 | C>T | Transition   | Asp       | Synonymous     |
| WT_IC #2  | 2110  | nsP2    | 0,021 | G>T | Transversion | Lys > Asn | Non-Synonymous |
| WT_IC #2  | 2129  | nsP2    | 0,011 | C>T | Transition   | Leu       | Synonymous     |
| WT_IC #2  | 2771  | nsP2    | 0,013 | G>A | Transition   | Val > Ile | Non-Synonymous |
| WT_IC #2  | 2814  | nsP2    | 0,011 | C>T | Transition   | Thr > Ile | Non-Synonymous |
| WT_IC #2  | 2917  | nsP2    | 0,011 | A>G | Transition   | Val       | Synonymous     |
| WT_IC #3  | 764   | nsP1    | 0,013 | G>A | Transition   | Gly > Arg | Non-Synonymous |
| WT_IC #3  | 22    | 5'NTR   | 0,228 | A>G | Transition   |           |                |
| WT_IC #3  | 25    | 5'NTR   | 0,042 | C>T | Transition   |           |                |
| WT_IC #3  | 1090  | nsP1    | 0,011 | T>C | Transition   | Ile       | Synonymous     |
| WT_IC #3  | 24    | 5'NTR   | 0,349 | C>T | Transition   |           |                |
| WT_IC #3  | 23    | 5'NTR   | 0,010 | G>A | Transition   |           |                |
| WT_IC #3  | 55    | 5'NTR   | 0,011 | A>G | Transition   |           |                |
| WT_IC #3  | 2834  | nsP2    | 0,011 | T>C | Transition   | Leu       | Synonymous     |
| WT_ISA #1 | 1448  | nsP1    | 0,016 | T>A | Transversion | Ser > Thr | Non-Synonymous |
| WT_ISA #1 | 2314  | nsP2    | 0,010 | A>G | Transition   | Lys       | Synonymous     |
| WT_ISA #1 | 3947  | nsP2    | 0,013 | G>A | Transition   | Val > Ile | Non-Synonymous |
| WT_ISA #1 | 4729  | nsP3    | 0,027 | T>C | Transition   | Thr       | Synonymous     |
| WT_ISA #1 | 6226  | nsP4    | 0,011 | A>G | Transition   | Val       | Synonymous     |
| WT_ISA #1 | 6589  | nsP4    | 0,055 | G>A | Transition   | Lys       | Synonymous     |
| WT_ISA #1 | 7742  | capsid  | 0,869 | A>G | Transition   | Gln > Arg | Non-Synonymous |
| WT_ISA #1 | 7980  | capsid  | 0,012 | A>G | Transition   | Ala       | Synonymous     |
| WT_ISA #1 | 8192  | capsid  | 0,014 | A>G | Transition   | Lys > Arg | Non-Synonymous |
| WT_ISA #1 | 8824  | E2      | 0,013 | G>A | Transition   | Gly > Arg | Non-Synonymous |
| WT_ISA #1 | 9175  | E2      | 0,089 | A>G | Transition   | Thr > Ala | Non-Synonymous |
| WT_ISA #1 | 10948 | E1      | 0,012 | A>G | Transition   | Lys > Glu | Non-Synonymous |
| WT_ISA #2 | 75    | 5'NTR   | 0,014 | T>C | Transition   |           |                |
| WT_ISA #2 | 1039  | nsP1    | 0,092 | T>C | Transition   | Val       | Synonymous     |
| WT_ISA #2 | 943   | nsP1    | 0,087 | A>G | Transition   | Arg       | Synonymous     |
| WT_ISA #2 | 1849  | nsP2    | 0,019 | A>G | Transition   | Arg       | Synonymous     |
| WT_ISA #2 | 2448  | nsP2    | 0,015 | C>T | Transition   | Ala > Val | Non-Synonymous |
| WT_ISA #2 | 2484  | nsP2    | 0,016 | T>C | Transition   | Leu > Ser | Non-Synonymous |
| WT_ISA #2 | 3674  | nsP2    | 0,094 | A>G | Transition   | Thr > Ala | Non-Synonymous |
| WT_ISA #2 | 3853  | nsP2    | 0,102 | C>T | Transition   | Ile       | Synonymous     |
| WT_ISA #2 | 3916  | nsP2    | 0,636 | T>C | Transition   | Phe       | Synonymous     |
| WT_ISA #2 | 4030  | nsP2    | 0,143 | T>C | Transition   | Asn       | Synonymous     |
| WT_ISA #2 | 5151  | nsP3    | 0,102 | A>G | Transition   | Asp > Gly | Non-Synonymous |
| WT_ISA #2 | 5172  | nsP3    | 0,106 | C>T | Transition   | Ala > Val | Non-Synonymous |
| WT_ISA #2 | 5530  | nsP3    | 0,626 | A>G | Transition   | Gly       | Synonymous     |
| WT_ISA #2 | 5569  | nsP3    | 0,127 | A>G | Transition   | Gly       | Synonymous     |
| WT_ISA #2 | 5911  | nsP4    | 0,090 | A>G | Transition   | Arg       | Synonymous     |
| WT_ISA #2 | 6460  | nsP4    | 0,014 | A>G | Transition   | Ala       | Synonymous     |
| WT_ISA #2 | 6637  | nsP4    | 0,099 | T>C | Transition   | Cys       | Synonymous     |
| WT_ISA #2 | 7555  | liaison | 0,096 | T>C | Transition   |           |                |
| WT_ISA #2 | 7676  | capsid  | 0,132 | A>G | Transition   | Gln > Arg | Non-Synonymous |

|              |       |            |       |     |            |           |                |
|--------------|-------|------------|-------|-----|------------|-----------|----------------|
| WT_ISA #2    | 7771  | capsid     | 0,635 | A>G | Transition | Lys > Glu | Non-Synonymous |
| WT_ISA #2    | 9209  | E2         | 0,016 | A>G | Transition | Asp > Gly | Non-Synonymous |
| WT_ISA #2    | 9381  | E2         | 0,162 | A>G | Transition | Lys       | Synonymous     |
| WT_ISA #2    | 10175 | E1         | 0,096 | A>G | Transition | Lys > Arg | Non-Synonymous |
| WT_ISA #2    | 10377 | E1         | 0,119 | T>C | Transition | Ser       | Synonymous     |
| WT_ISA #2    | 10738 | E1         | 0,094 | G>A | Transition | Ala > Thr | Non-Synonymous |
| WT_ISA #2    | 11206 | E1         | 0,015 | A>G | Transition | Thr > Ala | Non-Synonymous |
| WT_ISA #2    | 11247 | E1         | 0,087 | A>G | Transition | Gly       | Synonymous     |
| WT_ISA #2    | 11358 | 3'NTR      | 0,163 | A>G | Transition |           |                |
| WT_ISA #2    | 11428 | 3'NTR      | 0,161 | A>G | Transition |           |                |
| WT_ISA #2    | 11496 | 3'NTR      | 0,125 | T>C | Transition |           |                |
| WT_ISA #2    | 11761 | 3'NTR      | 0,016 | T>C | Transition |           |                |
| WT_ISA #3    | 502   | nsP1       | 0,020 | A>G | Transition | Arg       | Synonymous     |
| WT_ISA #3    | 833   | nsP1       | 0,127 | A>G | Transition | Lys > Glu | Non-Synonymous |
| WT_ISA #3    | 1697  | nsP2       | 0,018 | C>T | Transition | Pro > Ser | Non-Synonymous |
| WT_ISA #3    | 2298  | nsP2       | 0,456 | T>C | Transition | Val > Ala | Non-Synonymous |
| WT_ISA #3    | 3460  | nsP2       | 0,138 | A>G | Transition | Glu       | Synonymous     |
| WT_ISA #3    | 3609  | nsP2       | 0,048 | A>G | Transition | Asn > Ser | Non-Synonymous |
| WT_ISA #3    | 3769  | nsP2       | 0,457 | A>G | Transition | Gln       | Synonymous     |
| WT_ISA #3    | 4234  | nsP3       | 0,154 | A>G | Transition | Gly       | Synonymous     |
| WT_ISA #3    | 4828  | nsP3       | 0,117 | A>G | Transition | Ala       | Synonymous     |
| WT_ISA #3    | 5151  | nsP3       | 0,444 | A>G | Transition | Asp > Gly | Non-Synonymous |
| WT_ISA #3    | 5182  | nsP3       | 0,111 | A>G | Transition | Pro       | Synonymous     |
| WT_ISA #3    | 5199  | nsP3       | 0,114 | C>T | Transition | Ala > Val | Non-Synonymous |
| WT_ISA #3    | 5243  | nsP3       | 0,165 | T>C | Transition | Ser > Pro | Non-Synonymous |
| WT_ISA #3    | 5701  | nsP4       | 0,139 | A>G | Transition | Leu       | Synonymous     |
| WT_ISA #3    | 6872  | nsP4       | 0,020 | T>C | Transition | Leu       | Synonymous     |
| WT_ISA #3    | 7097  | nsP4       | 0,045 | T>C | Transition | Leu       | Synonymous     |
| WT_ISA #3    | 7111  | nsP4       | 0,016 | A>G | Transition | Arg       | Synonymous     |
| WT_ISA #3    | 7297  | nsP4       | 0,130 | A>G | Transition | Glu       | Synonymous     |
| WT_ISA #3    | 7778  | capsid     | 0,156 | A>G | Transition | Lys > Arg | Non-Synonymous |
| WT_ISA #3    | 7815  | capsid     | 0,163 | A>G | Transition | Gln       | Synonymous     |
| WT_ISA #3    | 8081  | capsid     | 0,449 | A>G | Transition | Lys > Arg | Non-Synonymous |
| WT_ISA #3    | 8391  | E3         | 0,419 | G>A | Transition | Thr       | Synonymous     |
| WT_ISA #3    | 8655  | E2         | 0,404 | A>G | Transition | Arg       | Synonymous     |
| WT_ISA #3    | 8922  | E2         | 0,039 | C>T | Transition | His       | Synonymous     |
| WT_ISA #3    | 9106  | E2         | 0,054 | A>G | Transition | Lys > Glu | Non-Synonymous |
| WT_ISA #3    | 9919  | 6k peptide | 0,067 | A>G | Transition | Arg > Gly | Non-Synonymous |
| WT_ISA #3    | 10059 | E1         | 0,157 | T>C | Transition | Pro       | Synonymous     |
| WT_ISA #3    | 10322 | E1         | 0,126 | A>G | Transition | Lys > Arg | Non-Synonymous |
| WT_ISA #3    | 10458 | E1         | 0,154 | A>G | Transition | Thr       | Synonymous     |
| WT_ISA #3    | 10473 | E1         | 0,136 | A>G | Transition | Lys       | Synonymous     |
| WT_ISA #3    | 10518 | E1         | 0,157 | C>T | Transition | Asn       | Synonymous     |
| WT_ISA #3    | 10524 | E1         | 0,014 | T>C | Transition | Ile       | Synonymous     |
| WT_ISA #3    | 11482 | 3'NTR      | 0,029 | A>G | Transition |           |                |
| WT_ISA #3    | 11528 | 3'NTR      | 0,462 | A>G | Transition |           |                |
| ΔWT_IC #1 P1 | 5467  | nsP3       | 0,805 | G>A | Transition | Pro       | Synonymous     |
| ΔWT_IC #1 P1 | 8467  | E3         | 0,012 | G>A | Transition | Asp > Asn | Non-Synonymous |
| ΔWT_IC #1 P4 | 5467  | nsP3       | 0,872 | G>A | Transition | Pro       | Synonymous     |
| ΔWT_IC #1 P4 | 10509 | E1         | 0,011 | C>T | Transition | Pro       | Synonymous     |
| ΔWT_IC #1 P4 | 10542 | E1         | 0,014 | C>T | Transition | Asp       | Synonymous     |
| ΔWT_IC #2 P1 | 1597  | nsP1       | 0,997 | C>T | Transition | Arg       | Synonymous     |

|               |       |            |       |     |              |           |                |
|---------------|-------|------------|-------|-----|--------------|-----------|----------------|
| ΔWT_IC #2 P4  | 588   | nsP1       | 0,012 | G>A | Transition   | Arg > Glu | Non-Synonymous |
| ΔWT_IC #2 P4  | 1597  | nsP1       | 0,997 | C>T | Transition   | Arg       | Synonymous     |
| ΔWT_IC #2 P4  | 2077  | nsP2       | 0,011 | C>T | Transition   | Tyr       | Synonymous     |
| ΔWT_IC #2 P4  | 5307  | nsP3       | 0,018 | C>T | Transition   | Thr > Ile | Non-Synonymous |
| ΔWT_IC #2 P4  | 7189  | nsP4       | 0,010 | T>C | Transition   | Gly       | Synonymous     |
| ΔWT_ISA #1 P1 | 3068  | nsP2       | 0,404 | A>G | Transition   | Ser > Gly | Non-Synonymous |
| ΔWT_ISA #1 P1 | 4309  | nsP3       | 0,291 | G>A | Transition   | Glu       | Synonymous     |
| ΔWT_ISA #1 P1 | 4648  | nsP3       | 0,050 | C>T | Transition   | Ser       | Synonymous     |
| ΔWT_ISA #1 P1 | 5110  | nsP3       | 0,274 | C>T | Transition   | Phe       | Synonymous     |
| ΔWT_ISA #1 P1 | 5600  | nsP3       | 0,287 | A>G | Transition   | Thr > Ala | Non-Synonymous |
| ΔWT_ISA #1 P1 | 7938  | capsid     | 0,072 | A>C | Transversion | Thr       | Synonymous     |
| ΔWT_ISA #1 P1 | 8643  | E2         | 0,029 | A>G | Transition   | Leu       | Synonymous     |
| ΔWT_ISA #1 P1 | 9869  | 6k peptide | 0,022 | T>C | Transition   | Leu > Ser | Non-Synonymous |
| ΔWT_ISA #1 P1 | 10339 | E1         | 0,029 | A>G | Transition   | Thr > Ala | Non-Synonymous |
| ΔWT_ISA #1 P4 | 3068  | nsP2       | 0,250 | A>G | Transition   | Ser > Gly | Non-Synonymous |
| ΔWT_ISA #1 P4 | 4156  | nsP3       | 0,707 | G>A | Transition   | Gly       | Synonymous     |
| ΔWT_ISA #1 P4 | 4309  | nsP3       | 0,163 | G>A | Transition   | Glu       | Synonymous     |
| ΔWT_ISA #1 P4 | 4648  | nsP3       | 0,028 | C>T | Transition   | Ser       | Synonymous     |
| ΔWT_ISA #1 P4 | 4903  | nsP3       | 0,058 | T>C | Transition   | Leu       | Synonymous     |
| ΔWT_ISA #1 P4 | 5110  | nsP3       | 0,153 | C>T | Transition   | Phe       | Synonymous     |
| ΔWT_ISA #1 P4 | 5301  | nsP3       | 0,720 | A>T | Transversion | Asn > Ile | Non-Synonymous |
| ΔWT_ISA #1 P4 | 5600  | nsP3       | 0,164 | A>G | Transition   | Thr > Ala | Non-Synonymous |
| ΔWT_ISA #1 P4 | 10509 | E1         | 0,013 | C>T | Transition   | Pro       | Synonymous     |
| ΔWT_ISA #2 P1 | 5073  | nsP3       | 0,099 | A>G | Transition   | Glu > Gly | Non-Synonymous |
| ΔWT_ISA #2 P1 | 5713  | nsP4       | 0,105 | A>G | Transition   | Ser       | Synonymous     |
| ΔWT_ISA #2 P1 | 5971  | nsP4       | 0,575 | T>C | Transition   | Tyr       | Synonymous     |
| ΔWT_ISA #2 P1 | 8620  | E2         | 0,084 | T>C | Transition   | Ser > Pro | Non-Synonymous |
| ΔWT_ISA #2 P1 | 9180  | E2         | 0,447 | A>G | Transition   | Thr       | Synonymous     |
| ΔWT_ISA #2 P4 | 5073  | nsP3       | 0,078 | A>G | Transition   | Glu > Gly | Non-Synonymous |
| ΔWT_ISA #2 P4 | 5340  | nsP3       | 0,012 | C>A | Transversion | Thr > Lys | Non-Synonymous |
| ΔWT_ISA #2 P4 | 5713  | nsP4       | 0,074 | A>G | Transition   | Ser       | Synonymous     |
| ΔWT_ISA #2 P4 | 5971  | nsP4       | 0,578 | T>C | Transition   | Tyr       | Synonymous     |
| ΔWT_ISA #2 P4 | 6761  | nsP4       | 0,093 | A>G | Transition   | Thr > Ala | Non-Synonymous |
| ΔWT_ISA #2 P4 | 8620  | E2         | 0,159 | T>C | Transition   | Ser > Pro | Non-Synonymous |
